# Supplementary material for: Liver lipophagy ameliorates nonalcoholic steatohepatitis through extracellular lipid secretion
Source: PubMed Central journal article supplement (PMC10344867; doi:10.1038/s41467-023-39404-6), 2023-07-13
Supplement: 41467_2023_39404_MOESM2_ESM.pdf [file 41467_2023_39404_MOESM2_ESM.pdf]

### **Description of Additional Supplementary Files**

**Supplementary Data 1:** The list of compounds showing high score of robust Z for lipophagy induction.

**Supplementary Data 2:** The sequence information of gRNAs

**Supplementary Data 3:** The sequence information of PCR primers
